# Supplementary material
Source: PubMed Central journal article supplement (PMC6259324)
Supplement: supplementary_figures5.pdf [file supplementary_figures5.pdf]

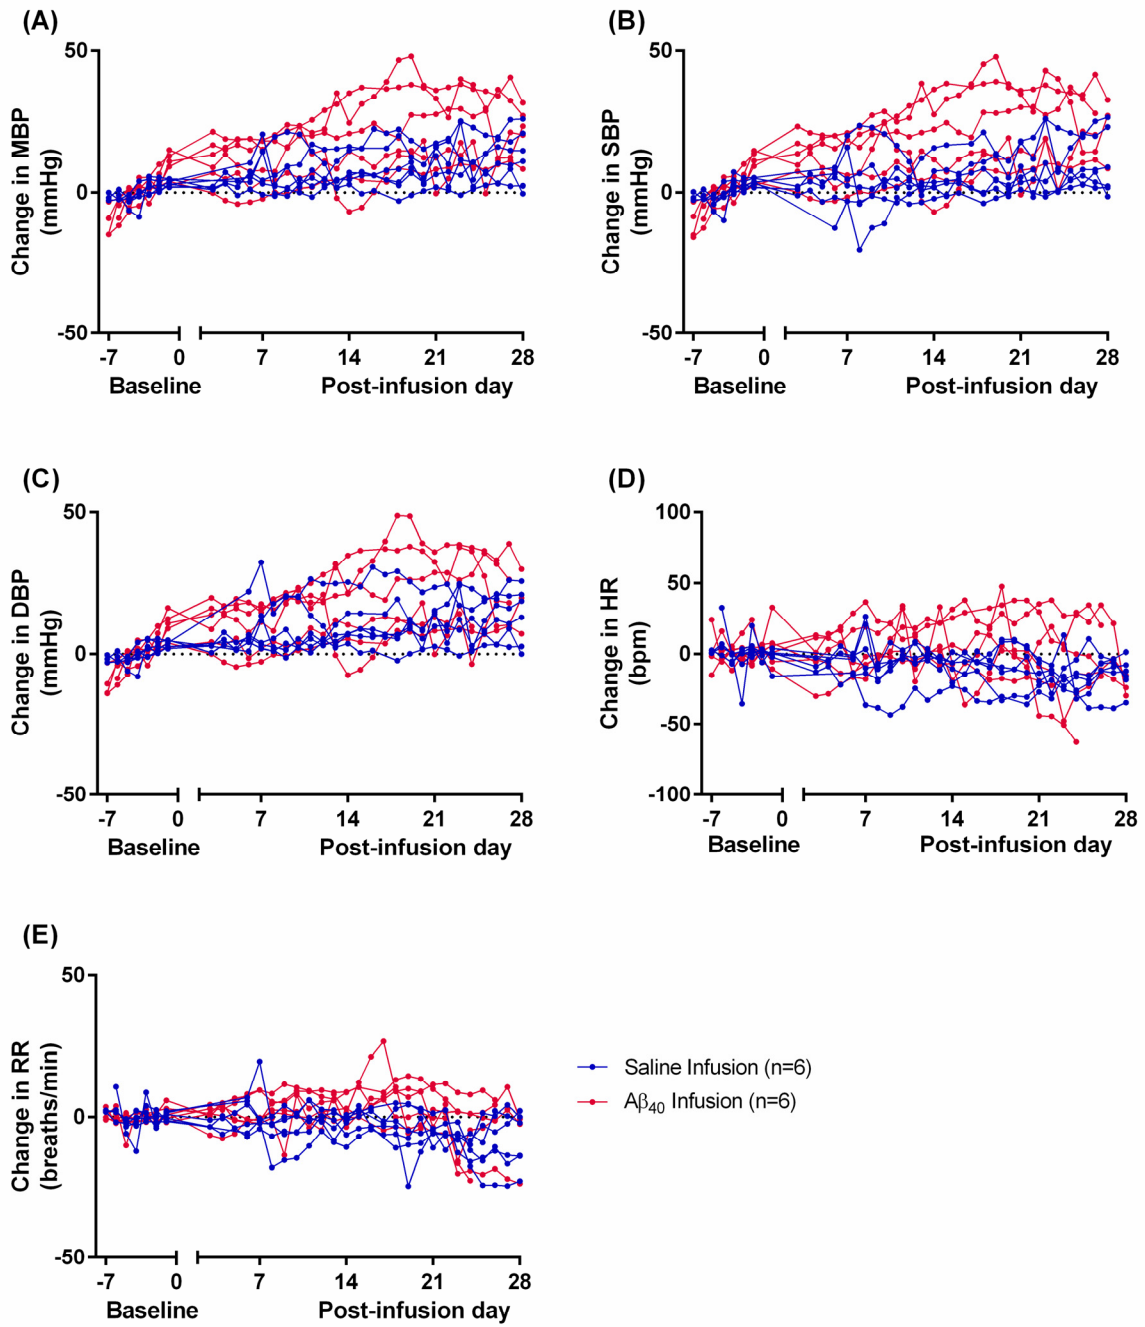

Figure 1

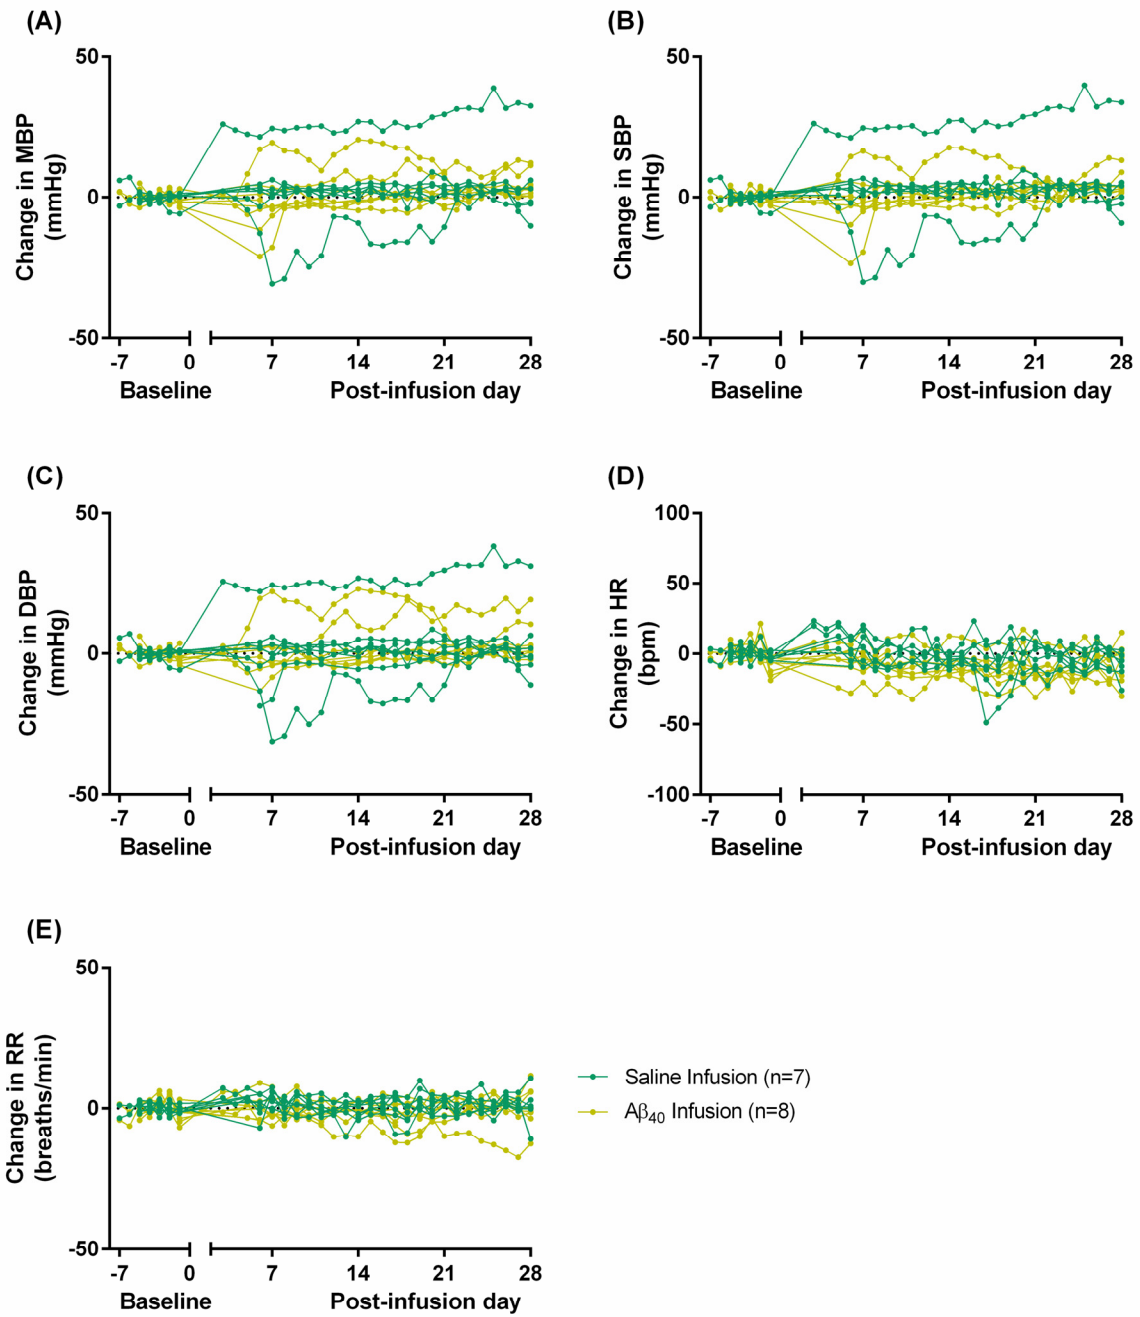

Figure 2

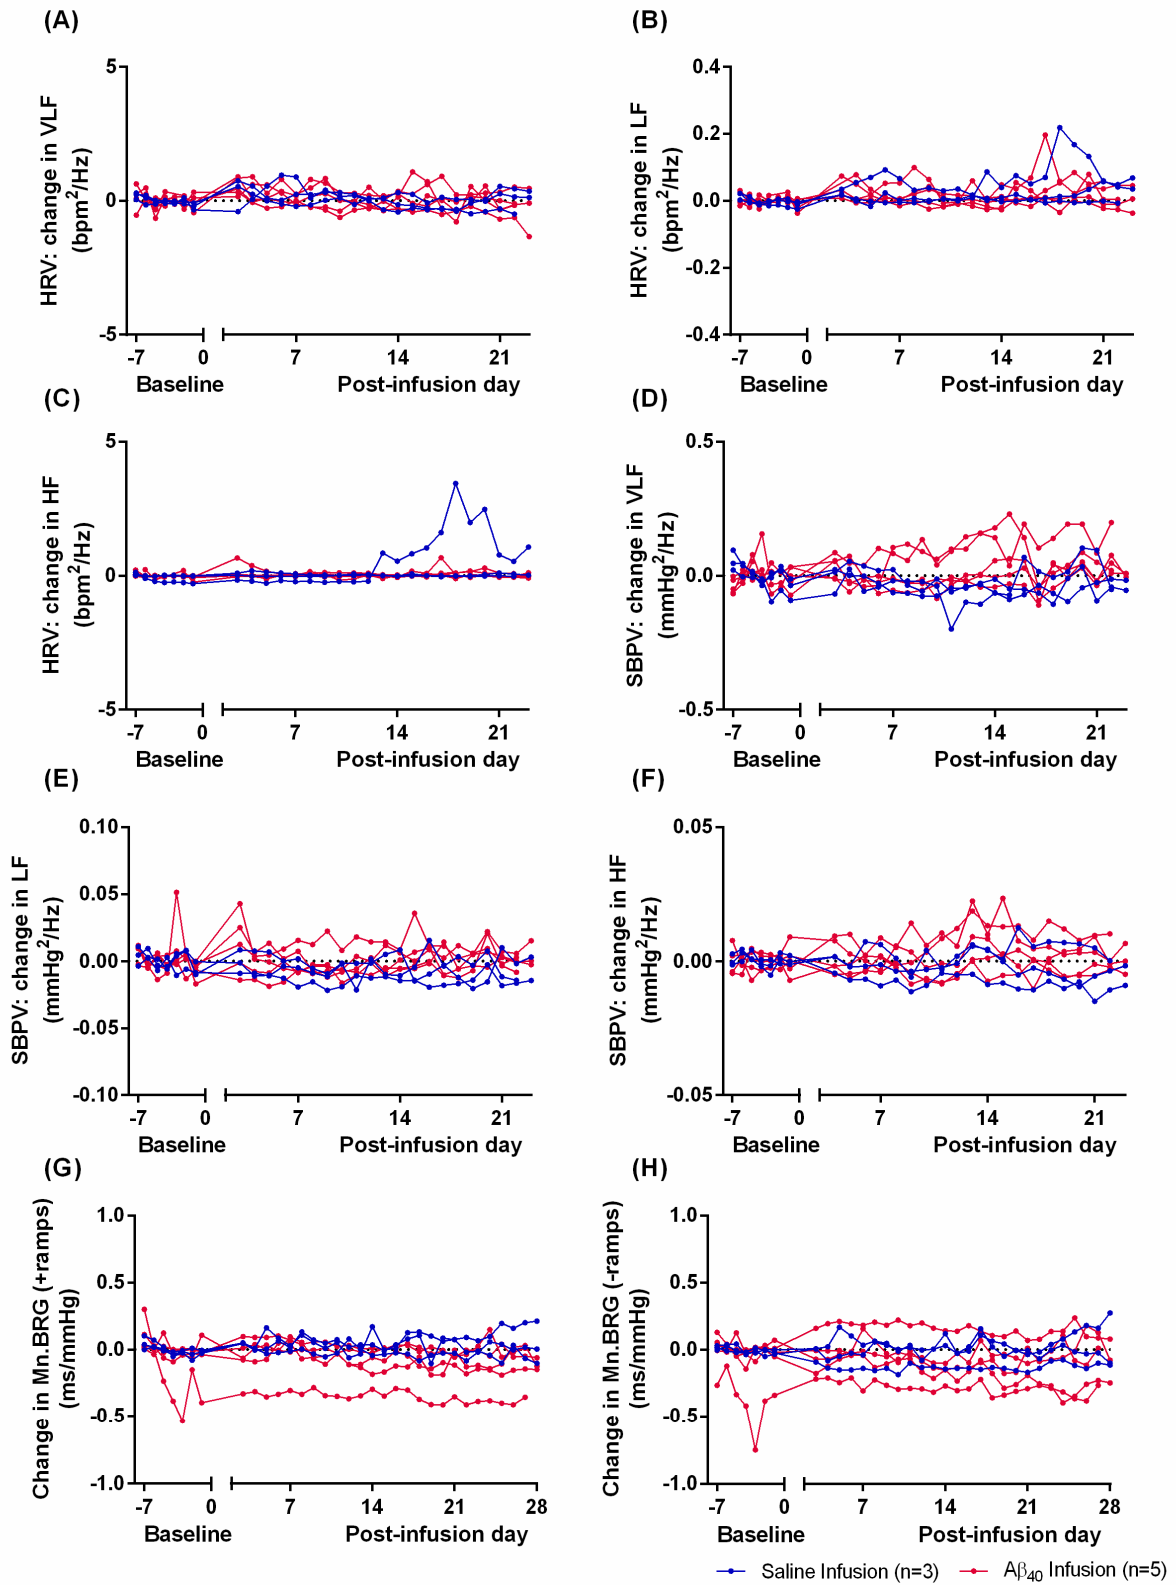

Figure 3

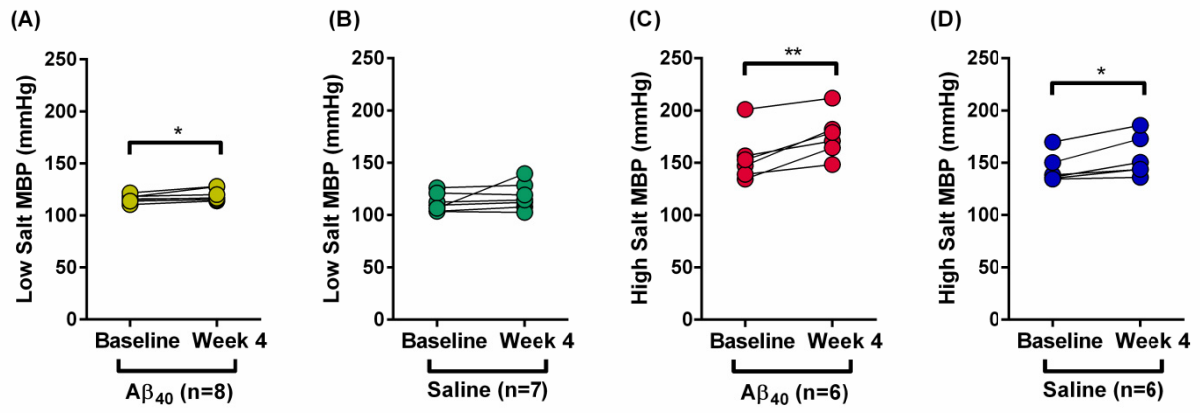

Figure 4

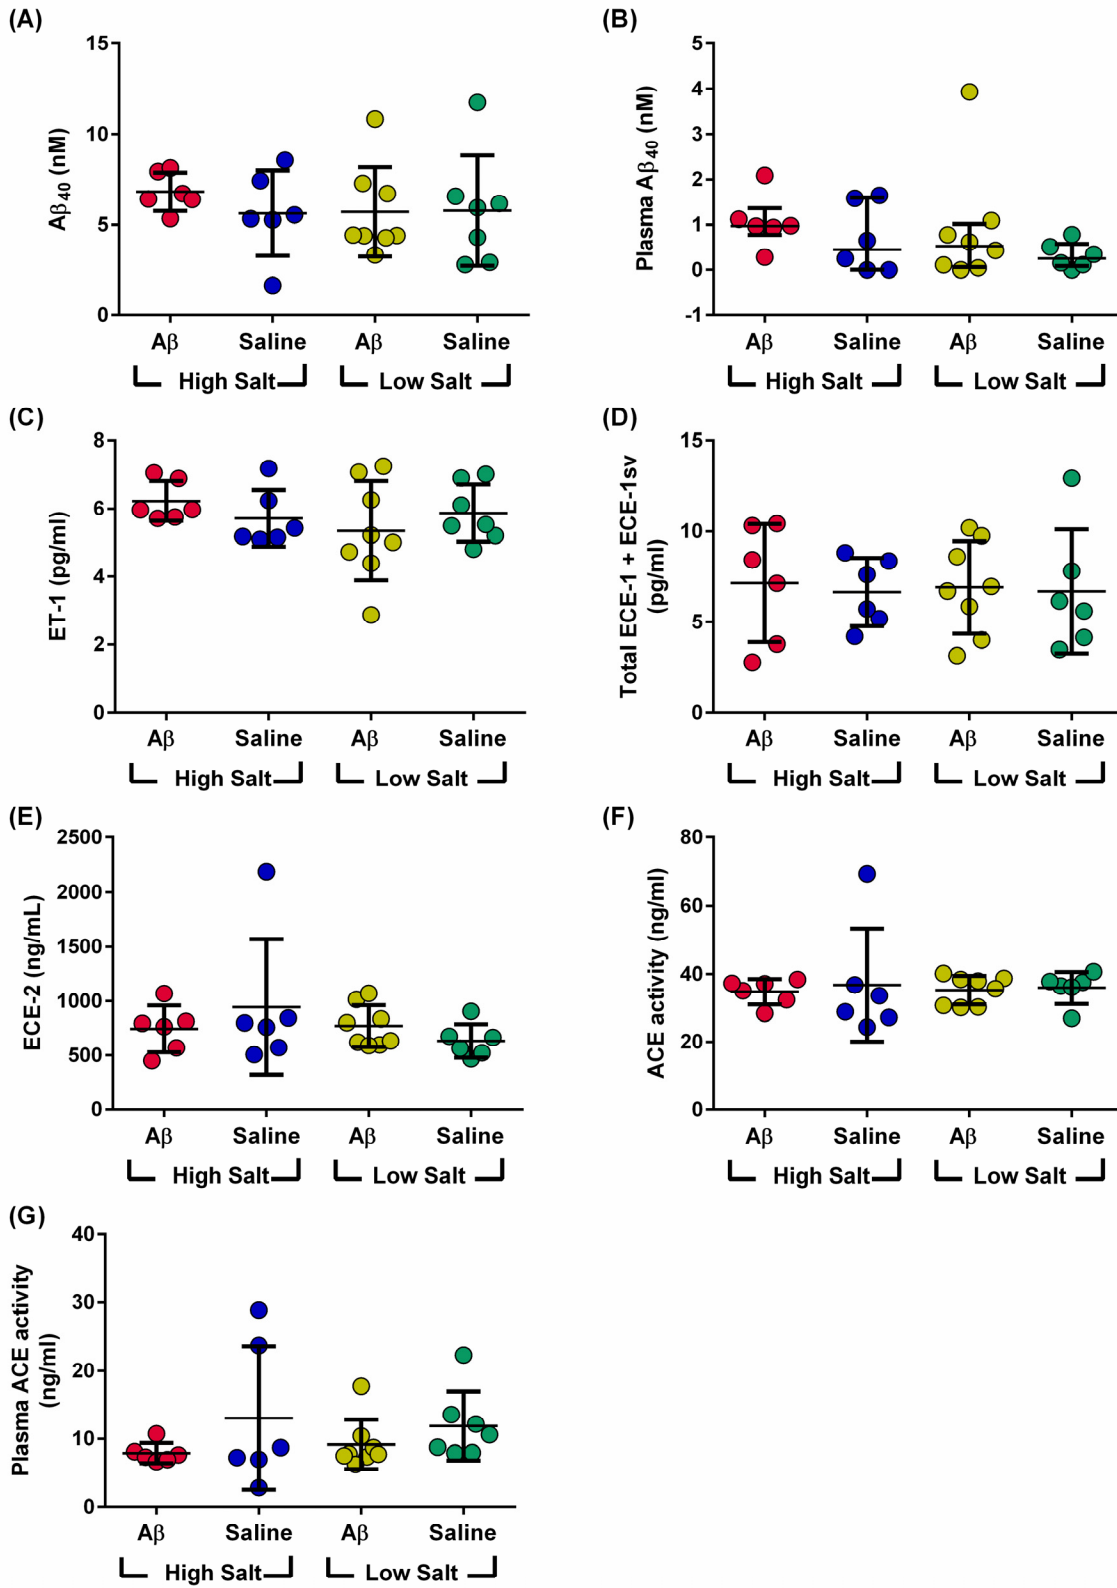

Figure 5

## HRV and SBPV power spectra

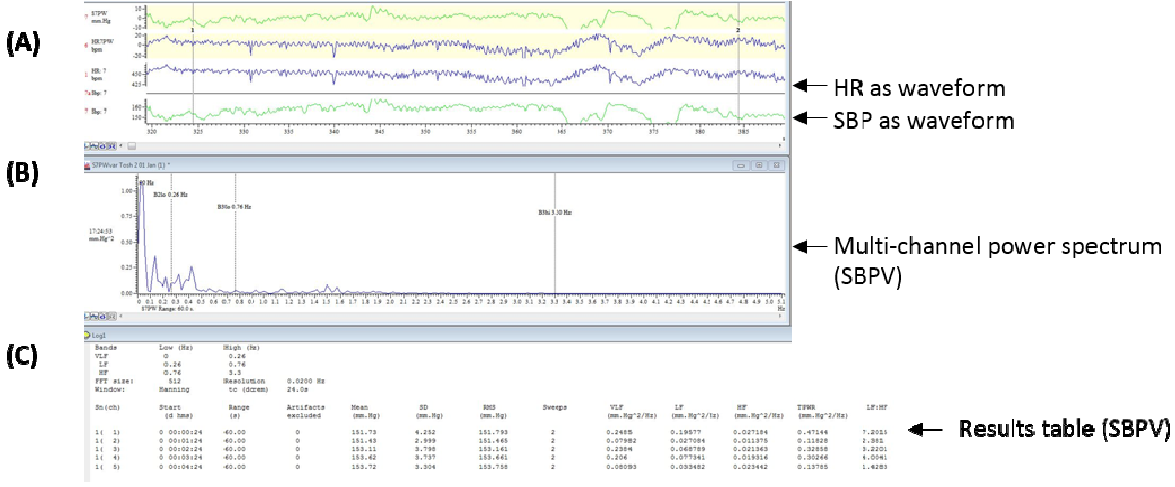

## Baroreflex sensitivity

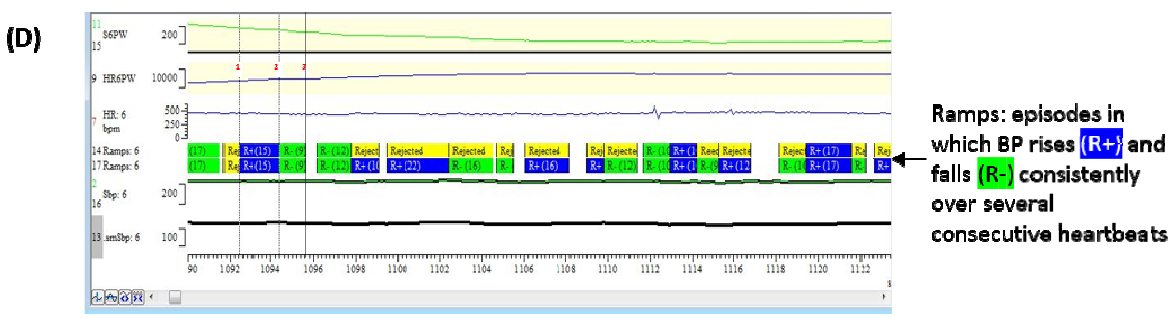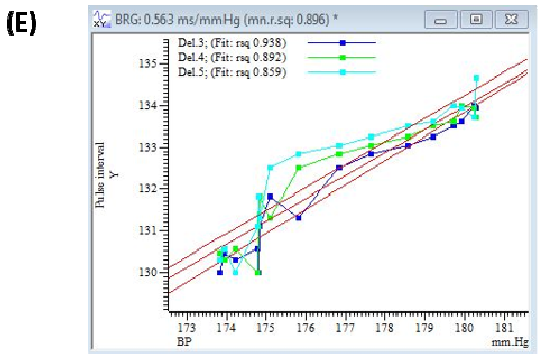

### Positive ramp example

- Onset (s): 1089.35
- Duration (s): 2.18
- Beats (n): 16
- BP change (mmHg): 6.448
- Mean.sBRG (ms/mmHg): 0.563
- mean r<sup>2</sup> = 0.896

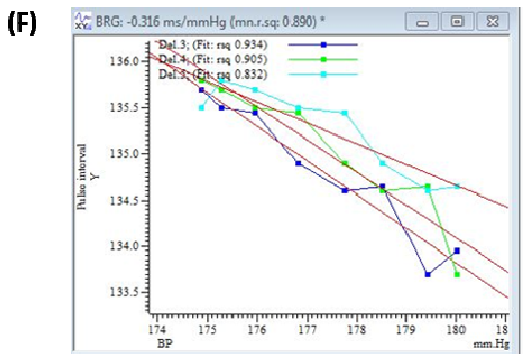

### Negative ramp example

- Onset (s): 1094.41
- Duration (s): 1.97
- Beats (n): 8
- BP change (mmHg): -5.115
- Mean.sBRG (ms/mmHg): -0.316
- mean r<sup>2</sup> = 0.890

Figure 6
